# Supplementary material
Source: Springer Nature journal article supplement (https://www.springermedizin.de/resource/supplementary/12982_2007_53_MOESM5_ESM.pdf/9604370)
Supplement: MOESM5 [file 9604370]

Dutch / Nederlands

Editorial

## **Open Access voor de niet-Engelstalige wereld: het slechten van de taalbarrière**

Auteur: Isaac Chun-Hai FUNG

Samenvatting

Dit editorial stelt het probleem van taalbarrières in wetenschappelijke communicatie centraal, dat ondanks het huidige succes van de Open Access Movement nog altijd bestaat. Er worden vier opties voor Engelstalige tijdschriften voorgesteld om de taalbarrière te slechten: 1) samenvattingen in alternatieve talen, verschaft door de auteurs, 2) vertalingen via Wiki open translation, 3) internationale commissies van vertalers en redacteurs en 4) alternatieve versies van tijdschriften in andere talen. Emerging Themes in Epidemiology kondigt aan dat het met ingang van heden vertalingen van samenvattingen of volledige teksten door de auteurs zal accepteren in de vorm van elektronische bijlagen.
